# Supplementary material for: Distinct mechanical properties of nanoparticle-tethering polymers
Source: Royal Society of Chemistry journal article supplement (doi:10.1039/c4ra04310c), 2014-01-01
Supplement: c4ra04310c1.pdf [file c4ra04310c1.pdf]

Supporting Information

# Distinct Mechanical Properties of Nanoparticle-Tethering Polymers

*Tao Jiang, Liquan Wang, and Jiaping Lin\**

*Shanghai Key Laboratory of Advanced Polymeric Materials, Key Laboratory for Ultrafine Materials  
of Ministry of Education, State Key Laboratory of Bioreactor Engineering, School of Materials  
Science and Engineering, East China University of Science and Technology, Shanghai 200237, China*

---

\* Tel: +86-21-64253370; E-mail: [jlin@ecust.edu.cn](mailto:jlin@ecust.edu.cn)

## 1. Effect of interaction strength $\epsilon_{np}$ on the stress-strain behavior of nanoparticle-tethering polymers

The pair correlation function  $g(r)$  was applied to further verify the packing structures of nanoparticles obtained by BOD. The peak position ratio of typical peaks in  $g(r)$  can determine the packing geometry.<sup>S1</sup> The results of  $g(r)$  at various  $\epsilon_{np}$  are shown in Figure S1. There is only one strong peak in  $g(r)$  at  $\epsilon_{np} = 1.0$ , while several peaks are exhibited at  $\epsilon_{np} = 5.0$  and 12.0. The typical peaks are numbered for larger  $\epsilon_{np}$ . The position ratio of typical peaks at  $\epsilon_{np} = 5.0$  and 12.0 is about  $1:\sqrt{2}:\sqrt{3}:2$ , indicating that the nanoparticles are packed approximately in a FCC manner (in accordance with the BOD results).

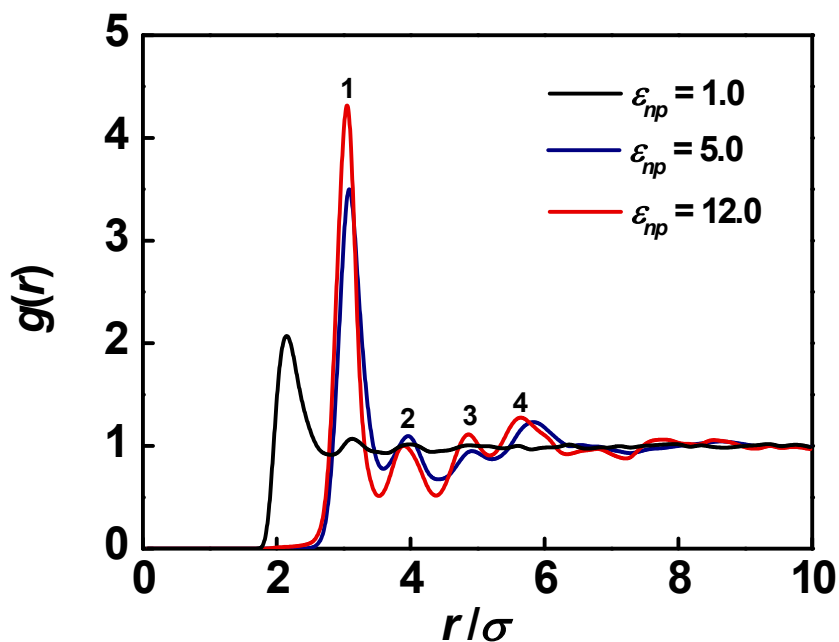

**Figure S1.** Pair correlation functions  $g(r)$  between the nanoparticles at various  $\epsilon_{np}$ . The typical peaks are numbered as 1, 2, 3, and 4 for larger  $\epsilon_{np}$ .

Figure S2 shows the diffusion coefficients of nanoparticles as a function of time at various  $\varepsilon_{np}$ . As can be seen, the diffusion coefficient decreases and finally arrives at a plateau for any  $\varepsilon_{np}$  with the evolution of time. The effect of  $\varepsilon_{np}$  on the diffusion coefficient of nanoparticles can be also viewed. At lower  $\varepsilon_{np}$  ( $\varepsilon_{np} = 2.0$ ), the diffusion coefficient is larger, and decreases more slowly with the time. With increasing  $\varepsilon_{np}$ , the diffusion coefficient decreases. At higher  $\varepsilon_{np}$  ( $\varepsilon_{np} = 12.0$ ), the diffusion coefficient is so small that the nanoparticles can be considered to be frozen.

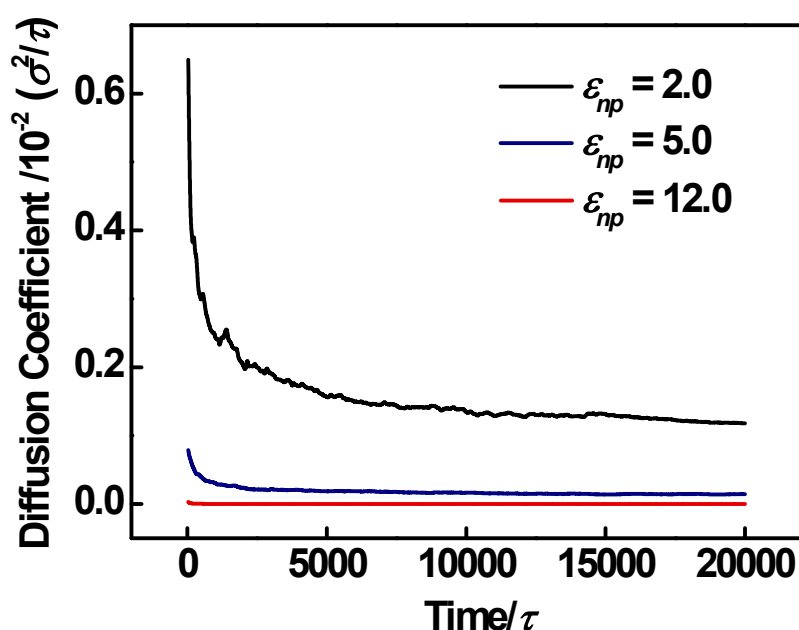

**Figure S2.** Diffusion coefficients of nanoparticles as a function of time at various  $\varepsilon_{np}$ .

## 2. Effect of polymer length $L$ on the stress-strain behavior of nanoparticle-tethering polymers

Figure S3a and S3b shows the BOD of nanoparticles and the pair correlation function  $g(r)$  between the nanoparticles for various  $L$ , respectively. It can be seen that for  $L = 4$ , six point groups are distributed on the hexagon vertices and four point groups are located on the square vertices in the BOD, suggesting the nanoparticles approximately adopt a hexagonally closed packing manner.<sup>S2,S3</sup> For  $L = 36$ , the diagonal and square distribution of points in the BOD implies a FCC packing of nanoparticles, similar to the case of  $L = 24$  (Figure 2c). As shown in Figure S2b, for  $L = 4$  and 36, the  $g(r)$  has the typical peak position ratios  $1:\sqrt{2}:2:\sqrt{5}$  and  $1:\sqrt{2}:\sqrt{3}:2$ , respectively. Therefore, the hexagonally closed packing of nanoparticles for  $L = 4$  and the FCC packing of nanoparticles for  $L = 36$  were further confirmed.

Figure S4 shows the change of nonbonding potential  $\Delta E_{\text{pair}}$  between deformed and undeformed states with respect to the strain for various  $L$ . It can be seen, at smaller strain the nonbonding potential  $E_{\text{pair}}$  increases more remarkably for smaller  $L$ , resulting in larger enthalpy gain for smaller  $L$ . Therefore, the interaction enthalpy as well as the conformation entropy makes important contribution to the higher stress and modulus for smaller  $L$ . At larger strain, the value of  $\Delta E_{\text{pair}}$  for smaller  $L$  is still larger than that for larger  $L$ . Therefore, the enthalpy gain is still larger for smaller  $L$ . However, the entropy loss first increases then decreases with increasing  $L$ . It is shown that at larger strain, the stress first increases and then decreases with increasing  $L$  (Figure 5a). Therefore, the stress is dominated by the entropy for smaller  $L$ , while it is controlled by the cooperative action of entropy and enthalpy for larger  $L$ .

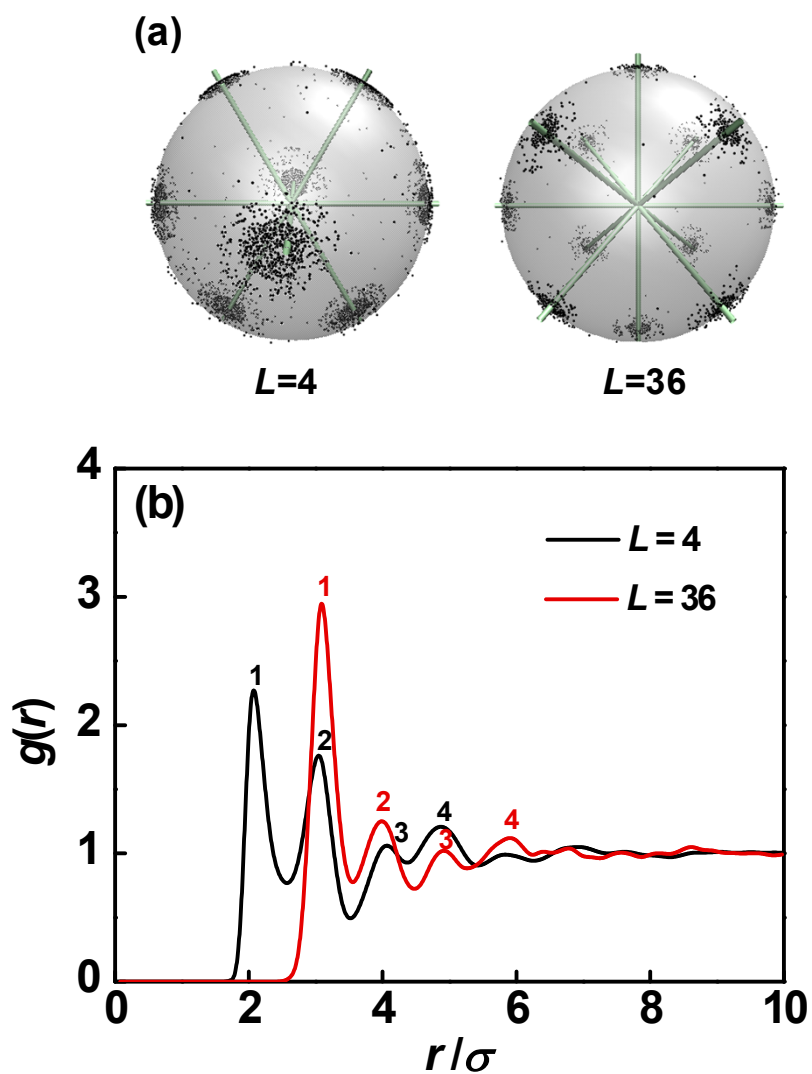

**Figure S3.** (a) BOD of nanoparticles for  $L = 4$  and  $L = 36$ . The solid lines indicate the BODs of ideal hexagonally closed packing and FCC packing structures. (b) Pair correlation functions  $g(r)$  between the nanoparticles for various  $L$ . The typical peaks are numbered as 1, 2, 3, and 4 for  $L = 4$  and  $L = 36$ .

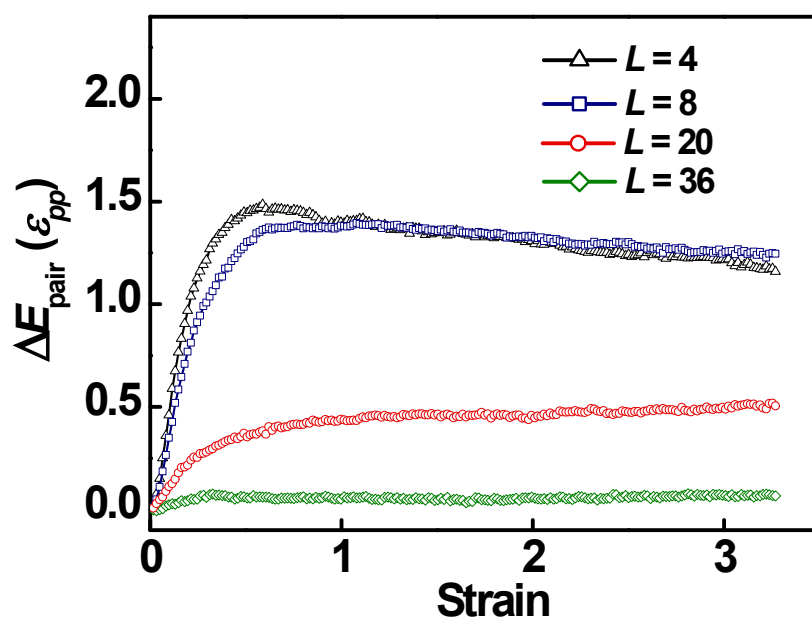

**Figure S4.** Change of nonbonding potential  $\Delta E_{\text{pair}}$  between deformed and undeformed states with respect to the strain for various  $L$ .

### 3. Effect of particle size $d$ on the stress-strain behavior of nanoparticle-tethering polymers

Figure S5a shows the pair correlation functions  $g(r)$  between the nanoparticles for various  $d$ . The insert shows the BOD of nanoparticles for  $d = \sigma$  and  $d = 4\sigma$ . In the BOD for  $d = \sigma$ , the projected points are approximately distributed in the form of point groups along the four-fold directions, indicating a non-perfect cubic-like packing for nanoparticles. This can be verified by the typical peak position ratio of  $1 : \sqrt{2} : 2$  in  $g(r)$ . With increasing  $d$  to  $4\sigma$ , there is no typical peak position ratio in  $g(r)$ , and the projected points are located randomly on the sphere surface in the BOD. Therefore, the nanoparticle packing is not ordered enough for  $d = 4\sigma$ .

In Figure 7a, the stress-strain curve for large nanoparticles ( $d = 4\sigma$ ) has an obvious yield point, exhibiting a glassy or crystalline feature. To explain this phenomenon, we examined the glass transition temperature for  $d = 4\sigma$ . The total volume  $V(T)$  as a function of  $T$  for  $d = 4\sigma$  is plotted in Figure S5b. As can be seen, the  $V(T)$  increases linearly with increasing  $T$  below or above a certain temperature. According to the intersections of fitted lines, the  $T_g$  is obtained to be about 1.1, which is higher than the examined temperature ( $T = 1.0$ ). Therefore, the stress-strain curve for  $d = 4\sigma$  exhibits a glassy feature.

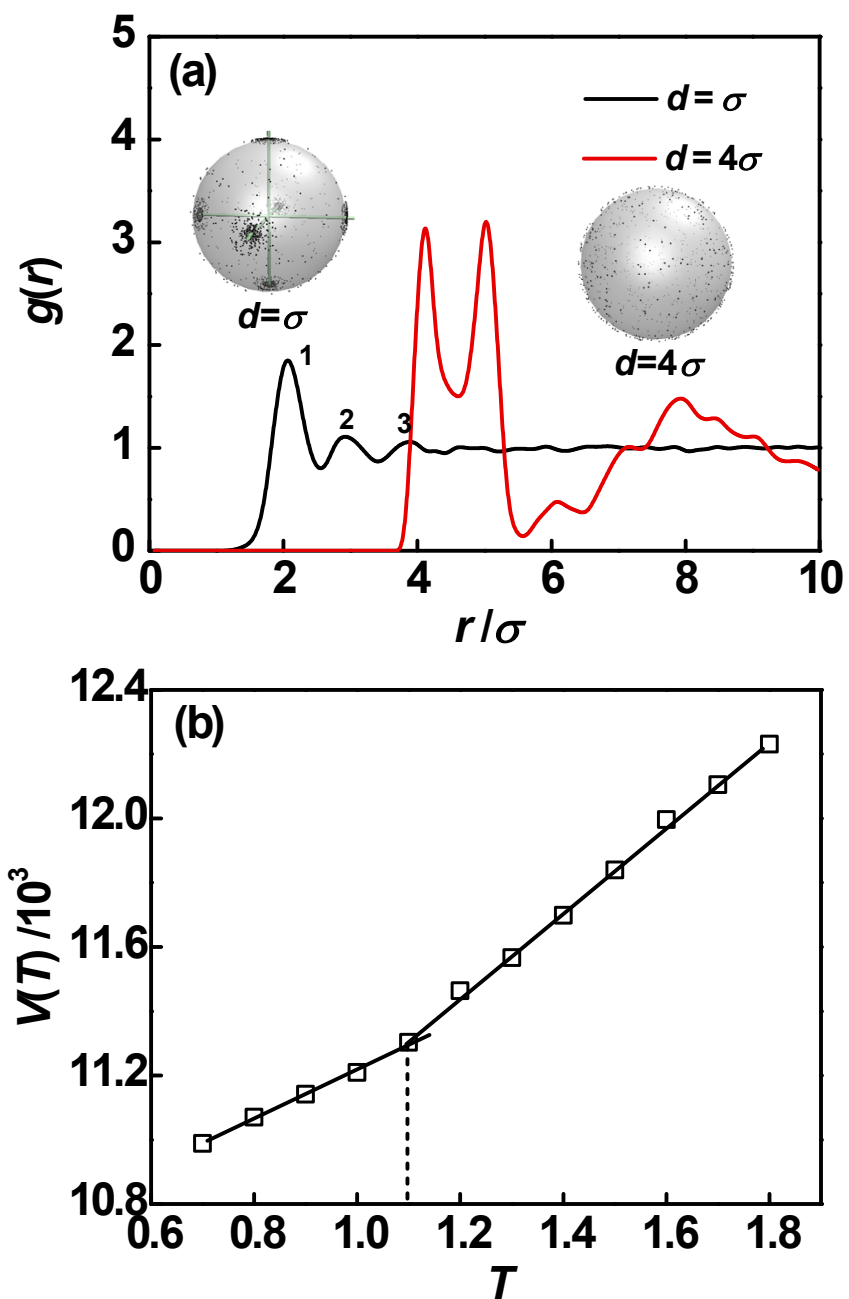

**Figure S5.** (a) Pair correlation functions  $g(r)$  between the nanoparticles for various  $d$ . The insert shows the BOD of nanoparticles for  $d = \sigma$  and  $d = 4\sigma$ . (b) Plot of the total volume  $V(T)$  versus  $T$  for the nanoparticle-tethering polymers with  $d = 4\sigma$ .



#### 4. Comparison with neat polymers and nanoparticle/polymer blends

We examined the glass transition temperatures for the neat polymers, nanoparticle/polymer blends, and nanoparticle-tethering polymers. Figure S6a shows the  $V(T)$  as a function of  $T$  for the neat polymers, nanoparticle/polymer blends, and nanoparticle-tethering polymers at  $T = 1.0$  and  $P = 0.0$ . By linear fitting, the  $T_g$  were estimated to be 0.45, 0.65, and 0.66 for the three systems. The  $T_g$  are all lower than 1.0, therefore these systems are in rubbery states at  $T = 1.0$ .

Figure S6b shows the changes of nonbonding potential  $\Delta E_{\text{pair}}$  between undeformed and deformed states for the neat polymers, nanoparticle/polymer blends, and nanoparticle-tethering polymers at  $T = 1.0$ . The  $E_{\text{pair}}$  almost has no increase for neat polymers, but increases rapidly with the strain at smaller strain for nanoparticle/polymer blends and nanoparticle-tethering polymers. The increase in  $E_{\text{pair}}$  for the nanoparticle/polymer blends and nanoparticle-tethering polymers are almost the same at smaller strain, but the  $\Delta E_{\text{pair}}$  for the nanoparticle-tethering polymers is larger than that for the nanoparticle/polymer blends. The larger  $\Delta E_{\text{pair}}$  leads to larger enthalpy gain. The enthalpy together with the entropy contributes to the highest stress for the nanoparticle-tethering polymers as shown in Figure 9a.

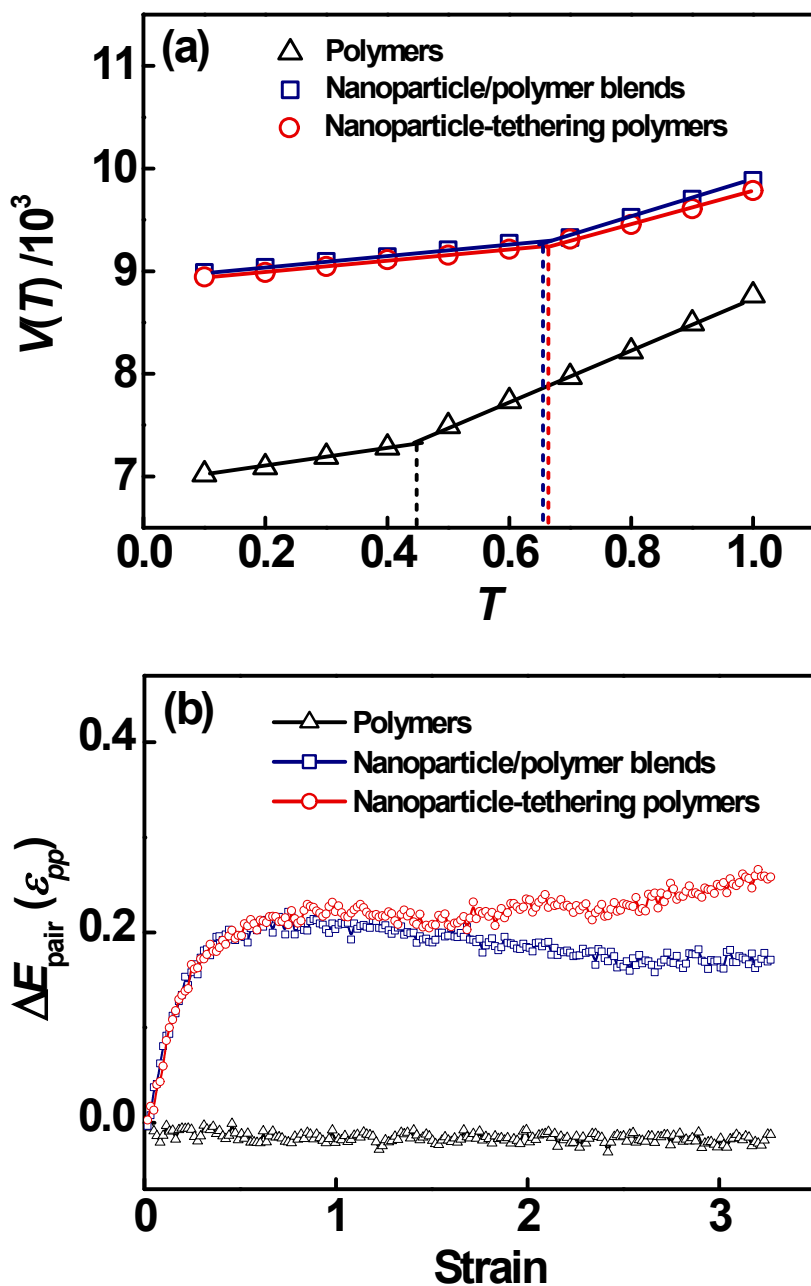

**Figure S6.** (a)  $V(T)$  versus  $T$  for the neat polymers, nanoparticle/polymer blends, and nanoparticle-tethering polymers at  $T = 1.0$  and  $P = 0.0$ . (b)  $\Delta E_{\text{pair}}$  versus the strain for the three systems. The polymer length was set to be 24, and the nanoparticle diameter was set to be  $2\sigma$ . The interaction strength between nanoparticles and polymers was  $\epsilon_{np} = 5.0$ .

## References

- [S1] C. J. Martinez, J. Liu, S. K. Rhodes, E. Luijten, E. R. Weeks and J. A. Lewis, *Langmuir*, 2005, **21**, 9978-9989.
- [S2] A. S. Keys, C. R. Iacovella and S. C. Glotzer, *J. Comput. Phys.*, 2011, **230**, 6438-6463.
- [S3] A. S. Keys, C. R. Iacovella and S. C. Glotzer, *Annu. Rev. Condens. Matter Phys.*, 2011, **2**, 263-285.
